# Supplementary material for: Transcriptome Analysis of Multiple Tissues in the Shrimp Penaeus vannamei Reveals the Typical Physiological Response to Three Pathogens
Source: MDPI journal article supplement (doi:10.3390/jmse11020389), 2023-02-09
Supplement: s1 [file s1]

Archive with 1 entries (1 files):
- jmse-2165746-supplementary.pdf
